# Supplementary material
Source: publisher figshare collection journal article supplement (https://acs.figshare.com/ndownloader/files/30828414)
Supplement: Supplementary file [file 30828414]

## Supporting Information

### **Fibroblast Growth Factor 2 Conjugated with Monomethyl Auristatin E Inhibits Tumor Growth in a Mouse Model**

Mateusz A. Krzyscik,<sup>†</sup> Malgorzata Zakrzewska,<sup>‡</sup> Vigdis Sørensen,<sup>‡,§</sup> Geir Frode Øy,<sup>||</sup> Skjalg Brunheim,<sup>||</sup> Ellen M. Haugsten,<sup>||,§</sup> Gunhild M. Mælandsmo,<sup>||,¥</sup> Antoni Wiedlocha,<sup>Δ,§,∘</sup> and Jacek Otlewski<sup>\*,†</sup>

<sup>†</sup> Department of Protein Engineering, Faculty of Biotechnology, University of Wrocław, Joliot-Curie 14a, 50-383 Wrocław, Poland

<sup>‡</sup> Advanced Light Microscopy Core Facility, Dept. Core Facilities, Institute for Cancer Research, The Norwegian Radium Hospital, Oslo University Hospital, Montebello, 0379 Oslo, Norway

<sup>§</sup> Centre for Cancer Cell Reprogramming, Institute of Clinical Medicine, Faculty of Medicine, University of Oslo, Montebello, 0379 Oslo, Norway

<sup>||</sup> Department of Tumor Biology, Institute for Cancer Research, The Norwegian Radium Hospital, Oslo University Hospital, Montebello, 0379 Oslo, Norway

<sup>Δ</sup> Department of Molecular Cell Biology, Institute for Cancer Research, The Norwegian Radium Hospital, Oslo University Hospital, Montebello, 0379 Oslo, Norway

<sup>¥</sup> University in Tromsø - Arctic University of Norway, Tromsø, Norway

<sup>∘</sup> Military Institute of Hygiene and Epidemiology, 01-163 Warsaw, Poland

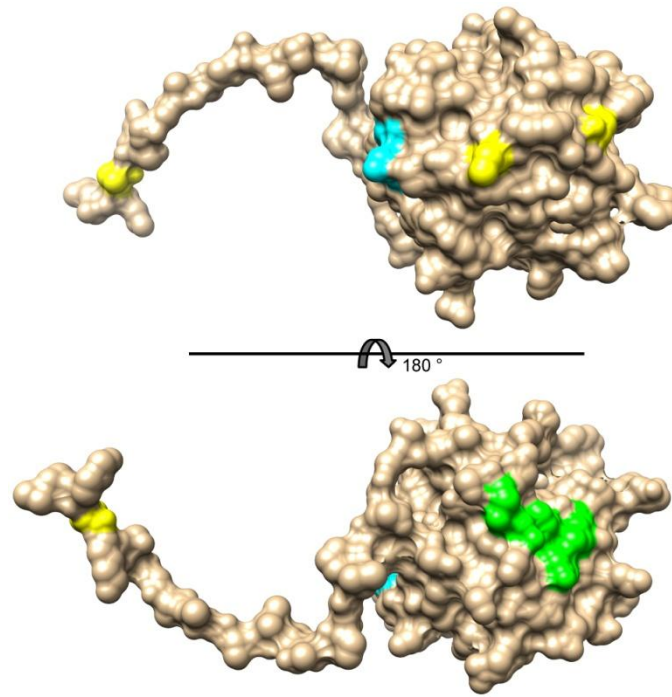

**Figure S1.** Spatial distribution of conjugation sites on the surface of FGF2. The structure of FGF2 with N-terminal extension of KCKSGG was predicted using the IntFOLD5 server and visualized by UCSF Chimera 1.15 software. Conjugation sites (surface-exposed Cys residues) are shown in yellow, primary FGFR1 binding sites in green, and secondary FGFR1 binding sites in cyan.

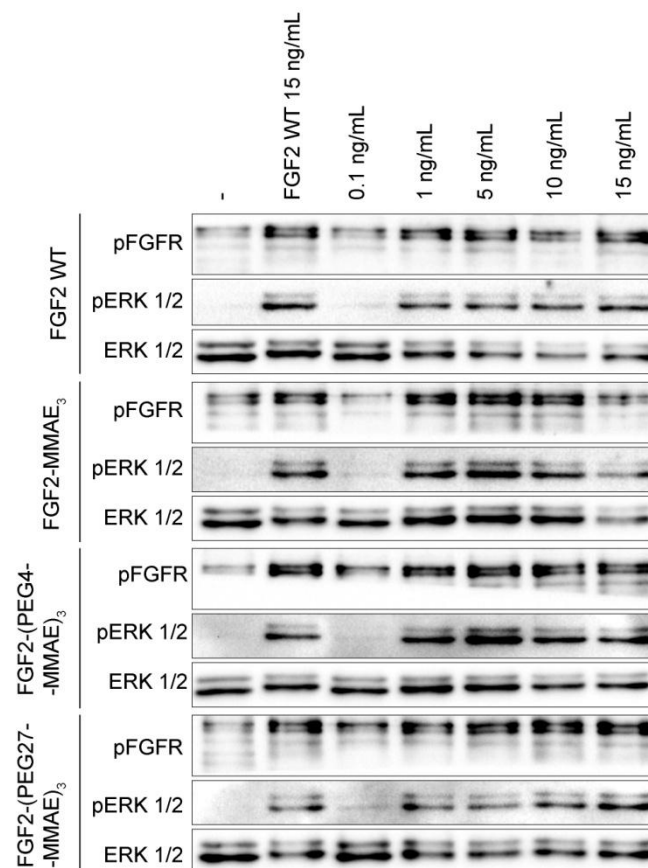

**Figure S2.** Analysis of concentration-dependent activation of downstream signaling in NIH 3T3 cells after 15 min stimulation with 0.1, 1, 5, 10, 15 ng/mL FGF2 WT or FGF2-based conjugates in the presence of 10 U/mL heparin detected by western blotting using anti-phospho-FGFR (pFGFR) and anti-phospho-ERK1/2 (p-ERK1/2) antibodies. Total ERK 1/2 served as a loading control.

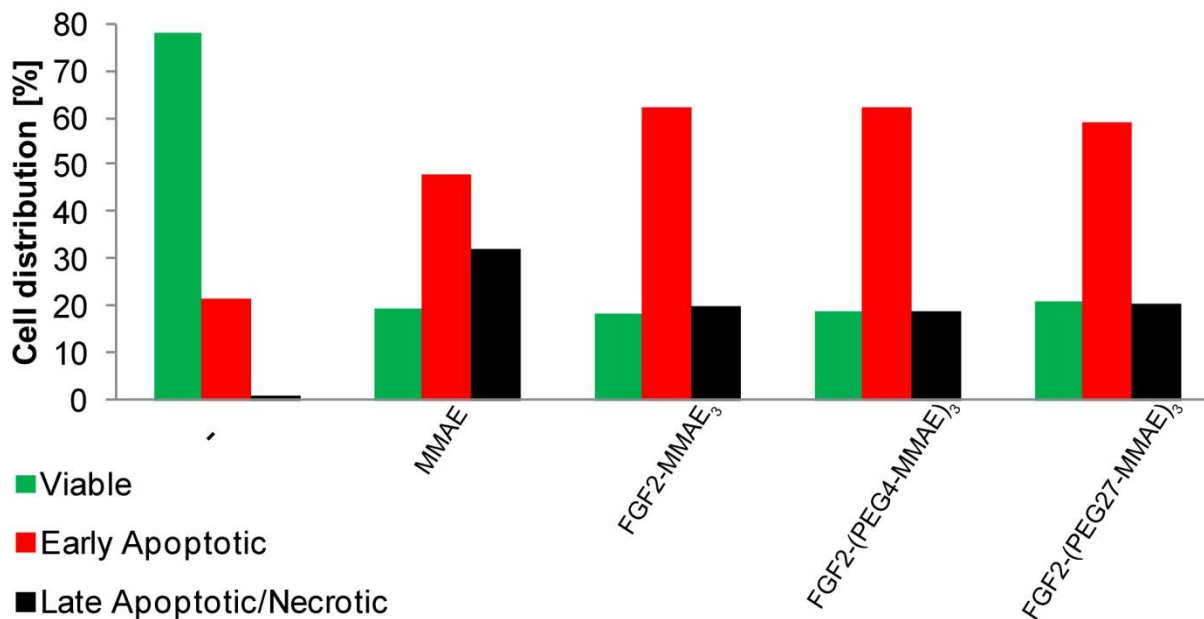

Figure S3. The mechanism of killing by MMAE and FGF2-based conjugates was verified by Annexin V and propidium iodide assay. MCF7-R1 cells were treated with 10 nM of MMAE, FGF2-MMAE<sub>3</sub>, FGF2-(PEG4-MMAE)<sub>3</sub>, or FGF2-(PEG27-MMAE)<sub>3</sub> for 72 h, then cells were stained with Annexin V-FITC and propidium iodide and then analyzed by flow cytometry.

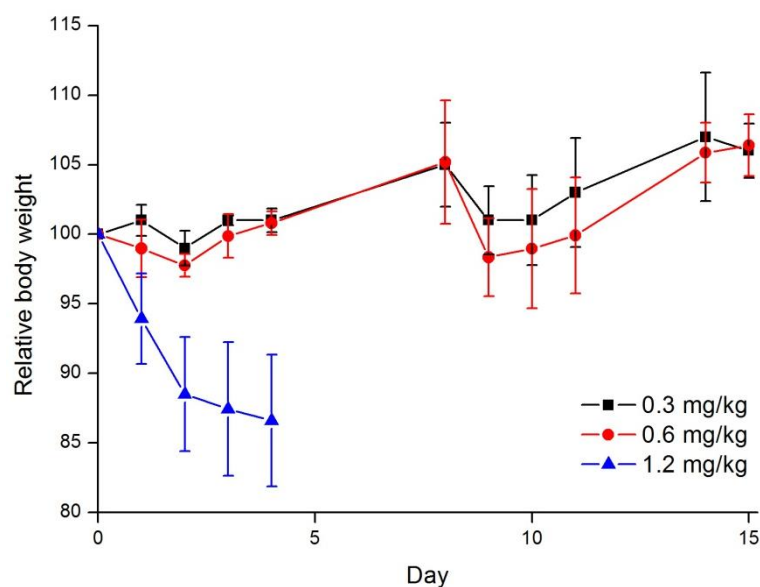

Figure S4. Determination of the maximum tolerated dose of free MMAE in NGC mice. Free MMAE was administered (i.v.) as a single dose (day 0) to three mice per group at a concentration of 0.3, 0.6 or 1.2 mg/kg body weight. Then body mass was monitored. A decrease in body weight greater than 15% resulted in termination of the experiment.
